# Supplementary material for: A quinoline-based turn-off fluorescent cation sensor
Source: Royal Society of Chemistry journal article supplement (doi:10.1039/c2ra22572g), 2012-10-23
Supplement: c2ra22572g.pdf [file c2ra22572g.pdf]

## SUPPLEMENTARY INFORMATION (SI)

# A quinoline-based turn-off fluorescent cation sensor

Paramjit Kaur,\*<sup>a</sup> Hardeep Kaur<sup>b</sup> and Kamaljit Singh\*<sup>b</sup>

<sup>a</sup>Department of Chemistry, UGC-Centre of Advance Studies-I, <sup>b</sup>Organic Synthesis Laboratory, Department of Applied Chemical Sciences and Technology, UGC-SAP(DRS-I) Department, Guru Nanak Dev University, Amritsar-143 005, India

## S1. Experimental

### 1. General

Mass spectrum was recorded on UPLC-Q-TOF mass spectrometer. <sup>1</sup>H NMR and <sup>13</sup>C NMR spectra have been recorded on BRUKER Avance II 400 MHz and 100 MHz, respectively with TMS as internal standard using CDCl<sub>3</sub> as deuterated solvent. Data is reported as follow: chemical shift in ppm ( $\delta$ ), integration, multiplicity (s=singlet, d=doublet, t=triplet, q=quartet, dd=double doublet), coupling constant J (Hz) and assignment. The purity of the solid products was checked by elemental analysis performed on Thermoelectron FLASH EA1112, CHNS analyzer. UV-visible spectral studies were conducted on Shimadzu 1601 PC spectrophotometer with a quartz cuvette (path length, 1 cm). The absorption spectra have been recorded between 1100 and 200 nm. The cell holder of the spectrophotometer was thermostatted at 25°C for consistency in the recordings. The steady state fluorescence experiments were carried out on Cary Eclipse spectrofluorometer at ambient temperature. A slit width of 5 nm was used with  $\lambda_{\text{ex}} = 320$  nm and  $\lambda_{\text{em}} = 376$  nm. The titration experiment was accomplished by varying the concentration of metal ion and keeping the compound concentration constant (30  $\mu\text{M}$ ). In fluorescence titration experiment, working solutions were prepared by making dilution of compound stock (0.1mM) with HPLC grade methanol.

### 2. Computational Methods

All theoretical calculations were carried out by using the Gaussian 09 suite of programs.

The molecular geometry of **5** was optimized by DFT/B3LYP<sup>1</sup>/6-311G\* method. **5**:Hg<sup>2+</sup> and **5**:Cu<sup>2+</sup> geometries were optimized by DFT/MPW1PW91/GEN method in which 6-311G basis set was used for C, H, N and O with additional diffuse function for the donor atoms (N and O) and Stuttgart-Dresden basis set (SDD) for Hg and Cu. Energy values and properties of the systems were computed at the same level and considering solvent (methanol) effects by using the Cossi and Barone's CPCM (conductor-like polarizable continuum model) modification<sup>2</sup> of the Tomasi's PCM formalism.<sup>3</sup> The first 50 excited states were calculated by using time-dependent density functional theory (TD-DFT) calculations. The molecular orbital contours were plotted using Gauss view 5.0.9.

### 3. Chemicals

Metal salts used in the spectrophotometric studies were of analytical grade and bought from Sigma-Aldrich. The solvents used were also of analytical grade purchased from Thomas Baker.

### 4. Synthetic Procedure for 1-5.

(a) Synthesis of 5-ethoxycarbonyl-6-methyl-4-phenyl-3,4-dihydropyrimidin-2(1*H*)-one (**1**). To the solution of benzaldehyde (1g, 9.4 mmol), urea (0.85g, 14mmol) and ethylacetoacetate (1.2ml, 9.4 mmol) in methanol, 2ml of conc. HCl was added and the solution was stirred at r.t for 24 hrs. The white solid separated in solution was filtered and washed 2-3 times with water. The recrystallization was done in hot ethanol.<sup>4</sup>

(b) Synthesis of 5-ethoxycarbonyl-6-methyl-4-phenylpyrimidine-2(1*H*)-one (**2**). A solution of **1** (0.5g, 1.97 mmol) in CH<sub>2</sub>Cl<sub>2</sub> was stirred with pyridinium chlorochromate (1.3g, 5.90 mmol) for 18 hrs. The reaction mixture was filtered over celite to remove any suspension, and the residue

---

<sup>1</sup> L. J. Bartolotti and K. Fluchick, *Reviews in Computational Chemistry* Lipkowitz, K. B.; Boyd, B. D. Eds., VCH, New York, 1996, **7**, 187-216.

<sup>2</sup> (a) V. Barone and M. Cossi, *J. Phys. Chem. A*, 1998, **102**, 1995; (b) M. Cossi, N. Rega, G. Scalmani, V. J. Barone, *Comp. Chem.*, 2003, **24**, 669-681.

<sup>3</sup> S. Miertus, E. Scrocco and J. Tomasi, *J. Chem. Phys.* 1981, **55**, 117; (b) R. Cammi, B. Mennucci and J. Tomasi, *J. Phys. Chem., A* 2000, **104**, 5631-5637.

<sup>4</sup> P. Biginelli, *Gazz. Chim. Ital.*, 1893, **23**, 360-416.

obtained after removal of the solvent was flash-chromatographed to obtain the corresponding pyrimidinone **2**.<sup>5</sup>

(c) Synthesis of 5-Ethoxycarbonyl-6-methyl-2-chloropyrimidines (**3**). 5-ethoxycarbonyl-6-methyl-4-phenylpyrimidin-2(1*H*)-one **2** (3 mmol) was taken in 10 ml of phosphorous oxychloride (POCl<sub>3</sub>) and reaction mixture was refluxed at 105 °C for 45 min. The solvent was removed under reduced pressure and crude was purified by column chromatography using EtOAc / Hexane as eluent to give desired product **3**.<sup>6</sup>

(d) Synthesis of 7-chloroquinyl-1,4-butandiamine (**4**). A mixture of 4,7-dichloroquinoline (1g, 5.1 mmol) and butandiamine (5.0ml, 25.3 mmol) was heated to 110°C for 6h under inert atmosphere and then cooled to room temperature. Aqueous sodium hydroxide (1N) was then added and the mixture was extracted with dichloromethane. The organic layers were washed with water, brine, dried over sodium sulphate, and evaporated under reduced pressure. The yellow solid obtained was recrystallized from ethylacetate.<sup>7</sup>

(e) Synthesis of 5-Ethoxycarbonyl-6-methyl-4-phenyl-2-[(7-chloroquinolin-4-ylamino)butylamino]pyrimidine (**5**). To the stirred solution of **4** (1.1g, 4.41 mmol) in dry THF (50ml) mixture of **3** (1g, 2.01mmol) and potassium carbonate (2.78g, 20.15 mmol) in dry THF was added. The reaction mixture was stirred for 48hrs at room temperature. Then, the reaction mixture was filtered and THF was removed under vacuum. The residue was purified by column chromatography using MeOH / EtOAc as eluent to give desired product. The product was recrystallized from DCM/ Hexane. White solid. Rf: 0.4 (EtOAc). Yield: 77%. IR (KBr):  $\nu_{\max}/\text{cm}^{-1}$ , 3383 (NH), 2986 (C-H), 1708 (C=O), 1268(C-O). Found: C, 66.10; H, 5.63; N, 13.95. Calc. For C<sub>27</sub>H<sub>28</sub>N<sub>5</sub>O<sub>2</sub>Cl: C, 66.18; H, 5.72; N, 14.30%. <sup>1</sup>H NMR (300 MHz; CDCl<sub>3</sub>; Me<sub>4</sub>Si; ppm)  $\delta_{\text{H}}$ : 0.94 (3H, t, *J* = 7.2 Hz, ester-CH<sub>3</sub>), 1.80 (4H, q, *J* = 6.9 Hz, CH<sub>2</sub>), 2.47 (3H, s, C6-CH<sub>3</sub>), 3.37 (2H, q, *J* = 6.3 Hz, CH<sub>2</sub>), 3.60 (2H, q, *J* = 7.2 Hz, CH<sub>2</sub>), 4.05 (2H, q, *J* = 7.2 Hz, ester-CH<sub>2</sub>), 5.06 (1H, s, NH), 5.45 (1H, s, NH), 6.38 (1H, d, *J* = 5.4 Hz, ArH), 7.3-7.58 (7H, m, ArH), 7.94 (1H, d, *J* = 2.1 Hz, ArH), 8.51 (1H, d, *J* = 5.4 Hz, ArH). <sup>13</sup>C NMR (75 MHz; CDCl<sub>3</sub>; Me<sub>4</sub>Si;

<sup>5</sup> K. Singh and K. Singh, *Aust. J. Chem.*; 2008, **61**, 910-913.

<sup>6</sup> K. Singh, K. Singh, B. Wan, S. Franzblau, K. Chibale and J. Balzarini, *Eur. J. Med. Chem.*; 2011, **46**, 2290-2294.

<sup>7</sup> J. K. Natarajan J. N. Alumasa, K. Yearick, K.A. Ekoue-Kovi, L.B. Casabianca, A.C.D. Dios, C. Wolf and P.D. Roebe, *J. Med. Chem.*, 2008, **51**, 3466-3469.

ppm)  $\delta_C$ :  $\delta$  13.5, 22.9, 25.8, 27.4, 40.6, 42.9, 61.1, 99.0, 115.4, 117.0, 120.8, 125.2, 127.8, 128.2, 128.7, 129.4, 134.8, 139.0, 149.0, 149.6, 151.9, 161.2, 168.7.  $m/z$  (EI): 490.1 ( $M^+$ ).

## 5. Calculation of Quantum Yield

Quantum yield of **5** and its complexes with  $Hg^{2+}$ ,  $Fe^{3+}$  and  $Cu^{2+}$  was calculated using formula:

$$\Phi_u = \Phi_s F_u A_s / F_s A_u$$

Where,  $\Phi_s$  is Quantum yield of standard

$F_u$  and  $F_s$  are integrated fluorescence of standard and unknown respectively.

$A_s$  and  $A_u$  are absorbance of standard and unknown respectively.

Quinine sulphate was used as standard whose quantum yield is 0.55 in 0.1N  $H_2SO_4$  at  $\lambda_{ex}$ = 320 nm.<sup>8</sup>

---

<sup>8</sup> Y. Li, H. Chong, X. Meng, S. Wang, M. Zhu, and Q. Guo, *Dalton Trans.*, 2012, **41**, 6189- 6194.

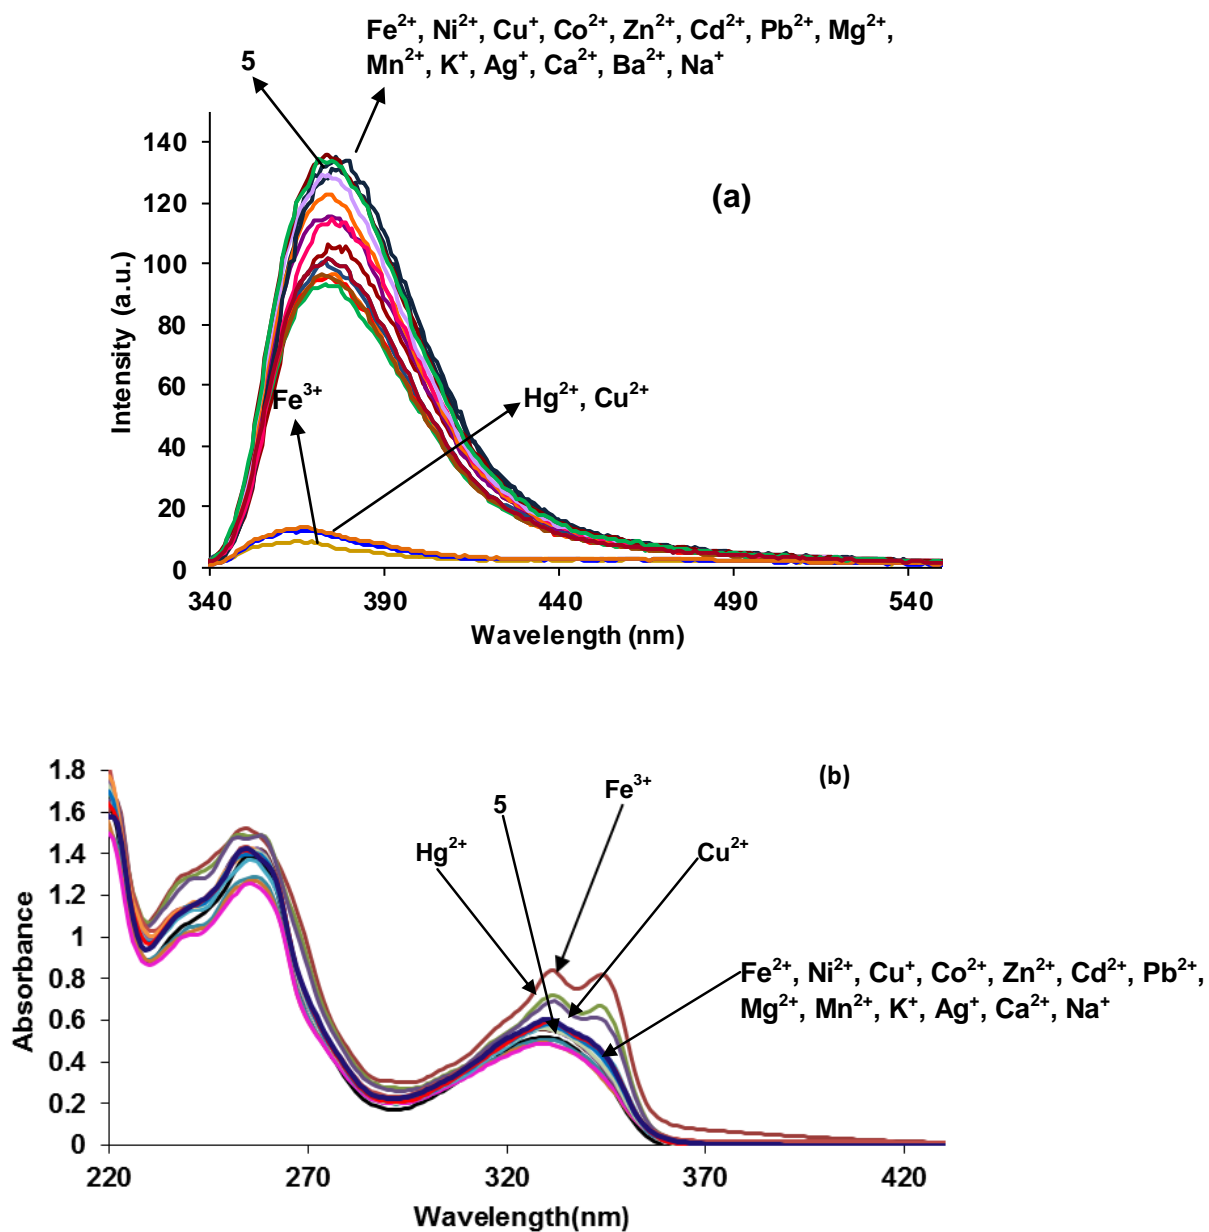

**Fig. S1** (a) Emission spectra; (b) absorption spectra of **5** (30  $\mu\text{M}$ ) in  $\text{CH}_3\text{OH}$  in the presence of various metal ions (60  $\mu\text{M}$ ) in distilled  $\text{H}_2\text{O}$ .

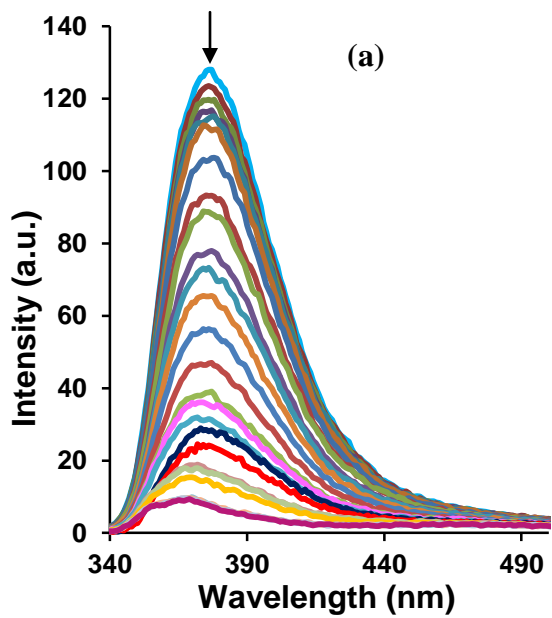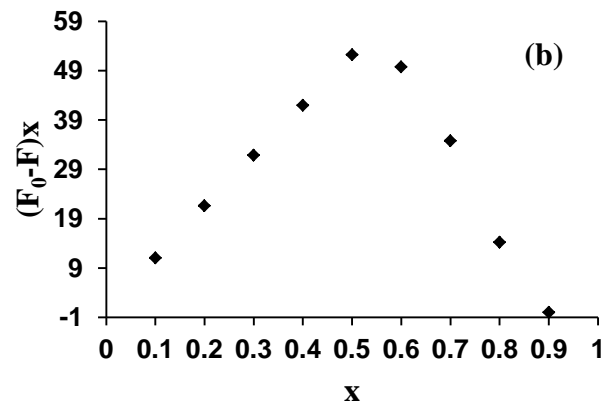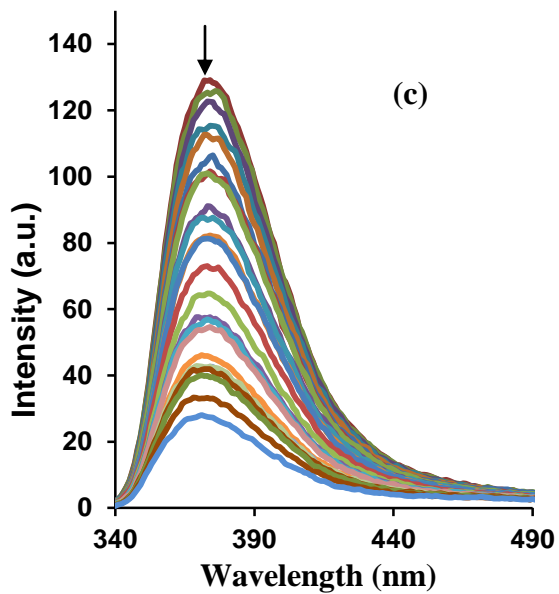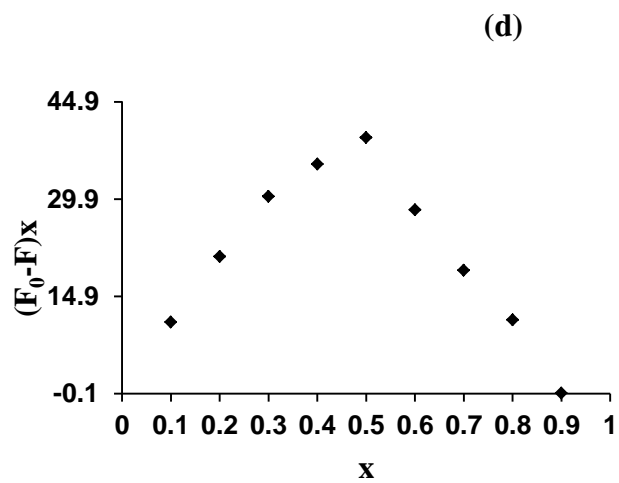

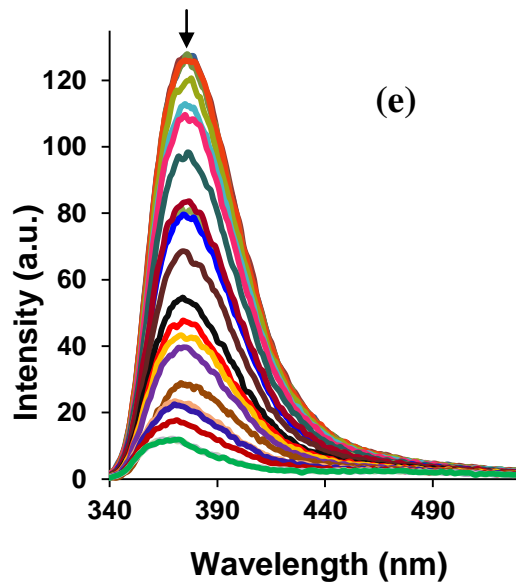

**Fig. S2** Fluorescence spectra of **5** (30  $\mu\text{M}$ ) in  $\text{CH}_3\text{OH}$  upon addition of (a)  $\text{Fe}^{3+}$  (0-1.5 equiv.), ( $\lambda_{\text{ex}} = 330 \text{ nm}$ ); (b) Job plot of  $\text{Fe}^{3+}$  complex formation.  $x = [\text{5}]/[\text{5}] + [\text{Fe}^{3+}]$  is the mole fraction of the **5**.  $F_0$  is the fluorescence, when  $x = 1$  and  $F$  is the fluorescence at respective values of  $x$ ; (c)  $\text{Cu}^{2+}$  (0-1.5 equiv.), ( $\lambda_{\text{ex}} = 330 \text{ nm}$ ); (d) Job plot of  $\text{Cu}^{2+}$  complex; (e)  $\text{Hg}^{2+}$  (0-1.5 equiv.).

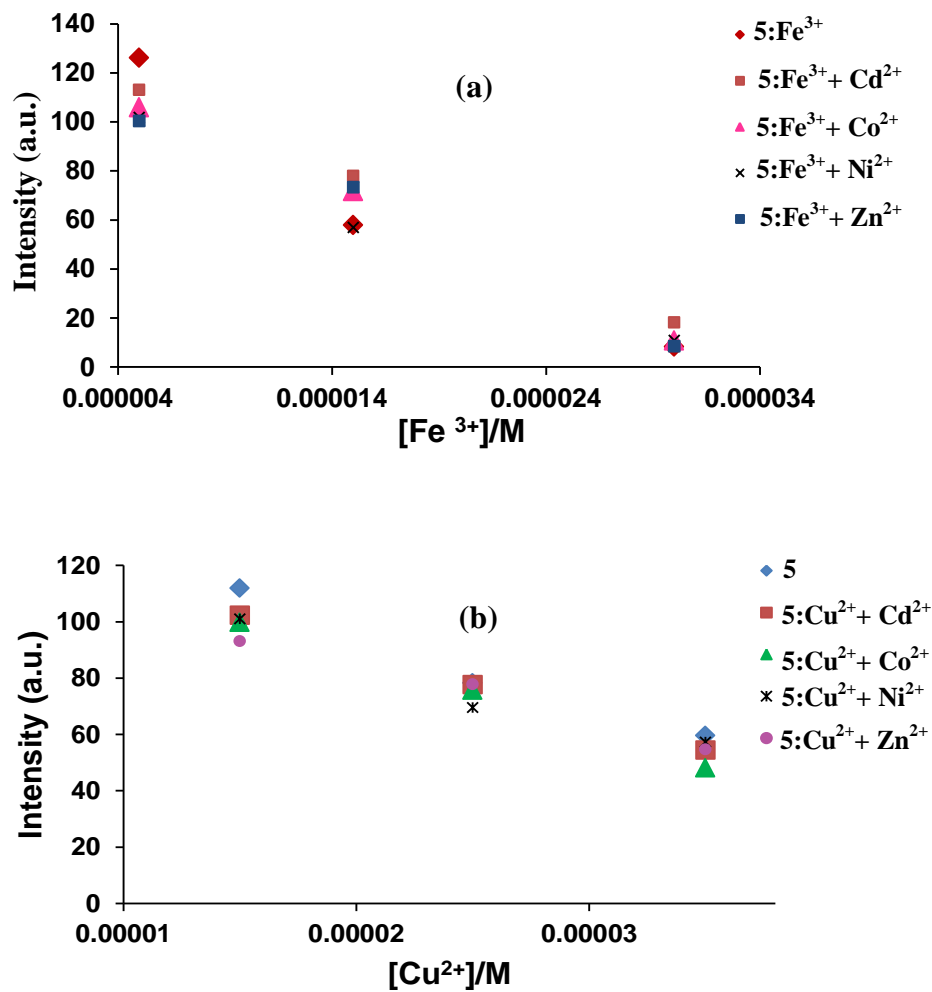

**Fig. S3** Changes in the fluorescence intensity of **5** (30  $\mu\text{M}$  in  $\text{CH}_3\text{OH}$ ) at 376 nm upon titration with increasing concentration of (a)  $\text{Fe}^{3+}$  (5, 15 and 30  $\mu\text{M}$  in distilled  $\text{H}_2\text{O}$ ); (b)  $\text{Cu}^{2+}$  (15, 25 and 35  $\mu\text{M}$  distilled  $\text{H}_2\text{O}$ ) in the presence of other metal ions (30  $\mu\text{M}$  in distilled  $\text{H}_2\text{O}$ ) at pH 7.4.



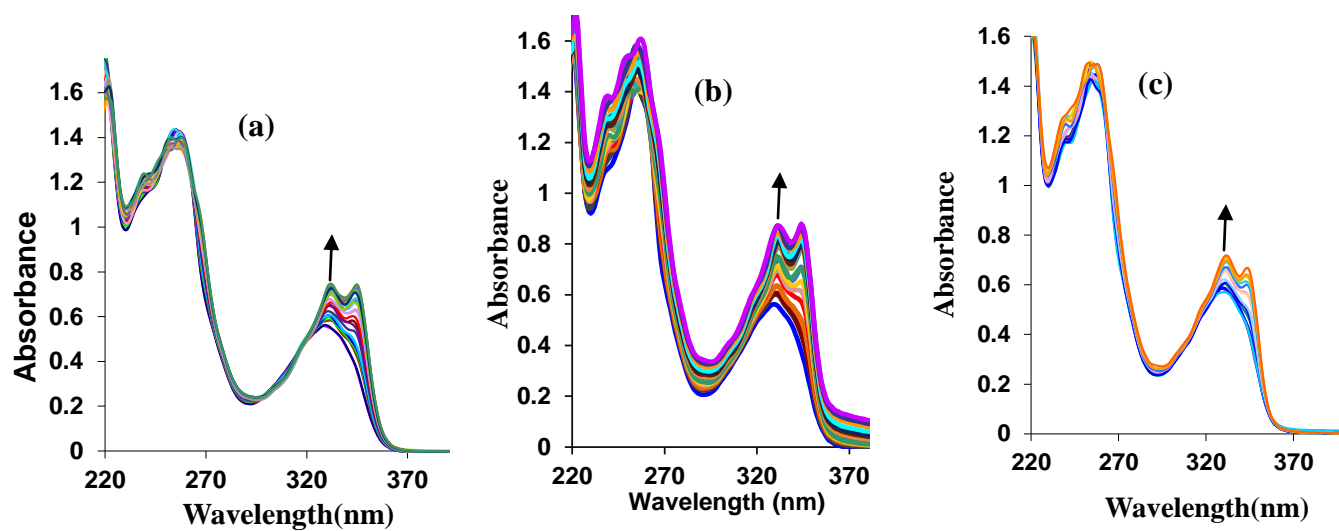

**Fig. S4** UV-vis spectra of **5** (30  $\mu$ M) in CH<sub>3</sub>OH titrated with (a) Hg<sup>2+</sup> (0-1.5 equiv.); (b) Fe<sup>3+</sup> (0-1.6 equiv.) and (c) Cu<sup>2+</sup> (0-1.5 equiv.) in distilled H<sub>2</sub>O.

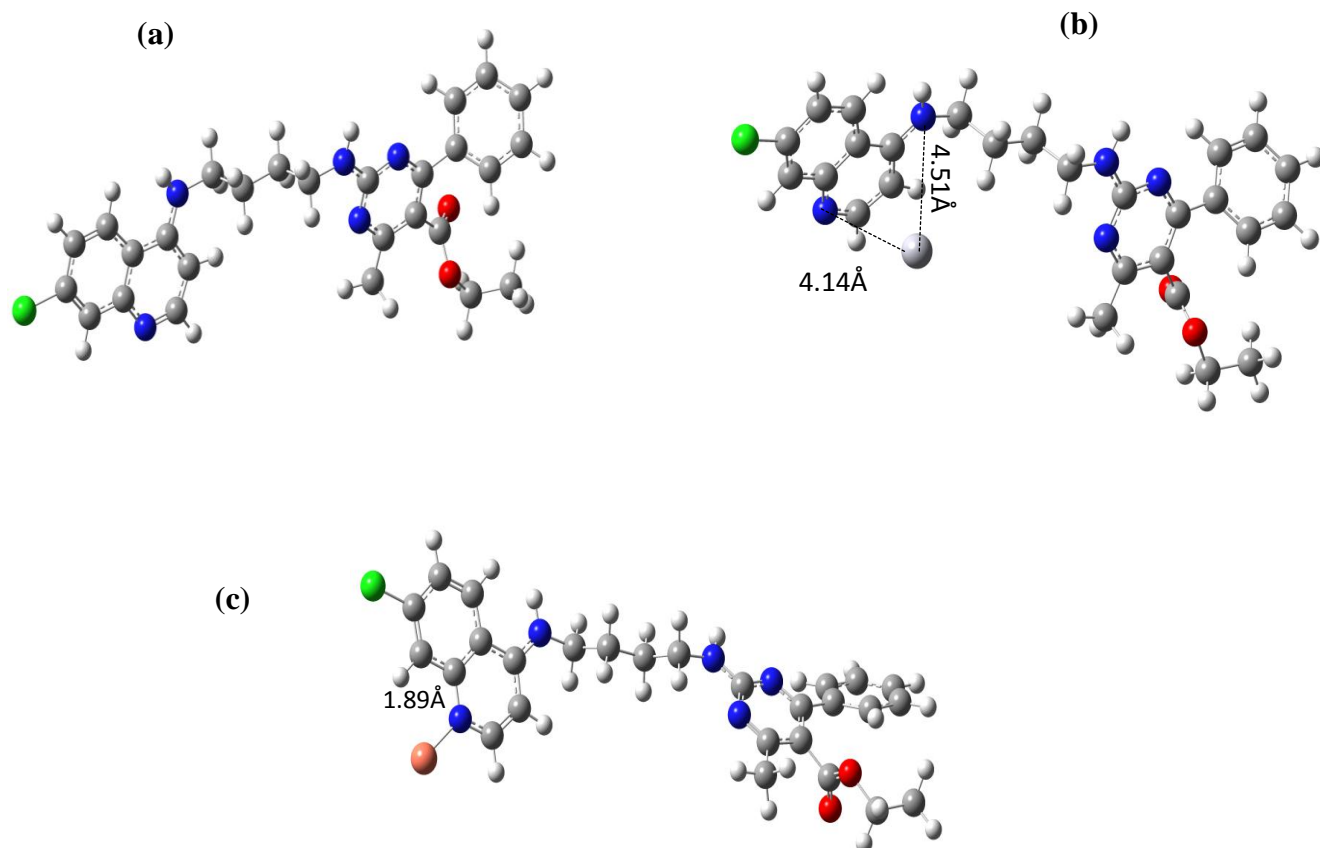

**Fig. S5** Optimized structure of (a) **5**; (b) **5**: $\text{Hg}^{2+}$  and (c) **5**: $\text{Cu}^{2+}$  using Gaussian 09 program. All the bond distances are in Å (angstrom).

**Table S1.** (a) Selected data of electronic transitions in **5** by TDDFT method at the B3LYP/6-311G\* level.<sup>[a][b]</sup>

| State | $\lambda$ [nm (eV)] | f      | Composition of band and CI coefficients                                     |
|-------|---------------------|--------|-----------------------------------------------------------------------------|
| 1     | 319.24 (3.88)       | 0.1529 | H→L, 0.14; H→L+1, 0.67                                                      |
| 12    | 250.43 (4.95)       | 0.4974 | H→L+3, 0.19; H-2→L+2, 0.27;<br>H-4→L+2, 0.24; H-4→L, 0.16;<br>H-7→L+3, 0.10 |

[a] Calculations were carried out for the lowest 50 excited states, and only energies above 240 nm with  $f > 0.15$  are shown. [b]  $f$  = oscillator strength; CI = configuration interaction; H = HOMO; L = LUMO.

(b) Cartesian coordinates from the optimized structure of **5** at B3LYP/6-311G\*

E = -1930.54a.u.

| Center Number | Atomic Number | Atomic Type | Coordinates (Å) |           |           |
|---------------|---------------|-------------|-----------------|-----------|-----------|
|               |               |             | X               | Y         | Z         |
| 1             | 6             | 0           | 2.964919        | 0.977070  | -0.342418 |
| 2             | 6             | 0           | 4.306651        | 0.646077  | -0.069131 |
| 3             | 6             | 0           | 4.656640        | -0.719343 | -0.171578 |
| 4             | 6             | 0           | 2.488478        | -1.229316 | -0.680556 |
| 5             | 7             | 0           | 2.061543        | 0.043895  | -0.645526 |
| 6             | 7             | 0           | 3.747306        | -1.647862 | -0.463391 |
| 7             | 6             | 0           | 6.047798        | -1.222114 | -0.012083 |
| 8             | 6             | 0           | 7.136821        | -0.546195 | -0.573430 |
| 9             | 6             | 0           | 6.272742        | -2.432946 | 0.652973  |

|    |   |   |           |           |           |
|----|---|---|-----------|-----------|-----------|
| 10 | 6 | 0 | 8.424070  | -1.062361 | -0.460207 |
| 11 | 6 | 0 | 7.561472  | -2.938930 | 0.782284  |
| 12 | 6 | 0 | 8.641443  | -2.255638 | 0.225308  |
| 13 | 1 | 0 | 9.257354  | -0.533896 | -0.912068 |
| 14 | 1 | 0 | 7.723555  | -3.870702 | 1.314761  |
| 15 | 1 | 0 | 9.646569  | -2.654049 | 0.320067  |
| 16 | 6 | 0 | 5.263769  | 1.660922  | 0.462164  |
| 17 | 8 | 0 | 5.870544  | 1.554062  | 1.499292  |
| 18 | 8 | 0 | 5.356345  | 2.742968  | -0.349829 |
| 19 | 6 | 0 | 6.175258  | 3.844216  | 0.120072  |
| 20 | 6 | 0 | 7.630752  | 3.665535  | -0.275021 |
| 21 | 1 | 0 | 6.066995  | 3.923732  | 1.202104  |
| 22 | 1 | 0 | 8.063105  | 2.794767  | 0.219996  |
| 23 | 1 | 0 | 7.729429  | 3.544348  | -1.356602 |
| 24 | 1 | 0 | 8.207993  | 4.546313  | 0.021197  |
| 25 | 6 | 0 | 0.169514  | -1.971485 | -1.212972 |
| 26 | 6 | 0 | -0.671402 | -1.953584 | 0.071033  |
| 27 | 1 | 0 | 0.061879  | -1.020696 | -1.737347 |
| 28 | 1 | 0 | -0.185024 | -2.757766 | -1.886756 |
| 29 | 6 | 0 | -2.158042 | -1.713516 | -0.206136 |
| 30 | 1 | 0 | -0.535104 | -2.902814 | 0.604285  |
| 31 | 1 | 0 | -0.280061 | -1.168241 | 0.726130  |
| 32 | 1 | 0 | -2.290613 | -0.764250 | -0.735535 |
| 33 | 1 | 0 | -2.547308 | -2.492571 | -0.873978 |
| 34 | 7 | 0 | 1.585056  | -2.198089 | -0.980736 |

|    |    |   |            |           |           |
|----|----|---|------------|-----------|-----------|
| 35 | 1  | 0 | 1.949985   | -3.136951 | -0.966775 |
| 36 | 6  | 0 | -2.998154  | -1.701163 | 1.080252  |
| 37 | 1  | 0 | -2.615706  | -0.951417 | 1.778363  |
| 38 | 1  | 0 | -2.901731  | -2.662762 | 1.593563  |
| 39 | 7  | 0 | -4.420330  | -1.465005 | 0.880816  |
| 40 | 1  | 0 | -4.954200  | -2.266922 | 0.590594  |
| 41 | 6  | 0 | -4.980302  | -0.237642 | 0.637326  |
| 42 | 6  | 0 | -6.391431  | -0.127457 | 0.360176  |
| 43 | 6  | 0 | -4.254445  | 0.947899  | 0.678070  |
| 44 | 6  | 0 | -7.277121  | -1.231993 | 0.333535  |
| 45 | 6  | 0 | -6.921942  | 1.175770  | 0.111354  |
| 46 | 6  | 0 | -4.901966  | 2.171148  | 0.435373  |
| 47 | 1  | 0 | -3.191231  | 0.952411  | 0.880469  |
| 48 | 6  | 0 | -8.613916  | -1.078945 | 0.049567  |
| 49 | 1  | 0 | -6.924695  | -2.231587 | 0.566663  |
| 50 | 6  | 0 | -8.302228  | 1.313302  | -0.186015 |
| 51 | 1  | 0 | -4.313701  | 3.086920  | 0.469202  |
| 52 | 6  | 0 | -9.114074  | 0.210353  | -0.217956 |
| 53 | 1  | 0 | -9.282003  | -1.931175 | 0.037660  |
| 54 | 1  | 0 | -8.679157  | 2.309589  | -0.377421 |
| 55 | 7  | 0 | -6.178148  | 2.317271  | 0.149076  |
| 56 | 17 | 0 | -10.826187 | 0.389248  | -0.586561 |
| 57 | 6  | 0 | 2.442040   | 2.388768  | -0.274466 |
| 58 | 1  | 0 | 2.874743   | 3.001565  | -1.067547 |
| 59 | 1  | 0 | 1.358951   | 2.372923  | -0.384078 |

|    |   |   |          |           |           |
|----|---|---|----------|-----------|-----------|
| 60 | 1 | 0 | 2.698463 | 2.868714  | 0.673674  |
| 61 | 1 | 0 | 5.426617 | -2.968551 | 1.066583  |
| 62 | 1 | 0 | 6.975995 | 0.373972  | -1.125033 |
| 63 | 1 | 0 | 5.736938 | 4.723582  | -0.353125 |

**Table S2.** (a) Selected data of electronic transitions in **5:Hg<sup>2+</sup>** by TDDFT method at the B3LYP/GEN level.<sup>[a][b]</sup>

| State | $\lambda$ [nm (eV)] | f      | Composition of band and CI coefficients                    |
|-------|---------------------|--------|------------------------------------------------------------|
| 10    | 318.20 (3.89)       | 0.1074 | H-1→L+1, -0.11; H-1→L+2, -0.29; H→L+1, 0.57; H→L+2, -0.24  |
| 11    | 317.27 (3.90)       | 0.2290 | H-1→L+1, -0.38; H-1→L+2, -0.38; H→L+2, 0.43                |
| 25    | 250.27 (4.95)       | 0.5858 | H-5→L+1, 0.12; H-5→L+2, 0.15; H-2→L+1, 0.41; H-2→L+2, 0.49 |

[a] Calculations were carried out for the lowest 50 excited states, and only energies above 240 nm with  $f > 0.10$  are shown. [b]  $f$  = oscillator strength; CI = configuration interaction; H = HOMO; L = LUMO.

(b) Cartesian coordinates from the optimized structure of **5:Hg<sup>2+</sup>** at MPW1PW91/GEN.

E= -2082.63a.u

| Center Number | Atomic Number | Atomic Type | Coordinates (Angstroms) |           |           |
|---------------|---------------|-------------|-------------------------|-----------|-----------|
|               |               |             | X                       | Y         | Z         |
| 1             | 6             | 0           | -4.444446               | -1.033011 | 0.240201  |
| 2             | 6             | 0           | -5.790781               | -0.552123 | 0.229885  |
| 3             | 6             | 0           | -6.026911               | 0.760781  | -0.280770 |
| 4             | 6             | 0           | -3.785423               | 0.950344  | -0.677280 |

|    |   |   |            |           |           |
|----|---|---|------------|-----------|-----------|
| 5  | 7 | 0 | -3.453098  | -0.286383 | -0.222160 |
| 6  | 7 | 0 | -5.007447  | 1.503527  | -0.716529 |
| 7  | 6 | 0 | -7.359290  | 1.365138  | -0.336043 |
| 8  | 6 | 0 | -8.518859  | 0.588534  | -0.566543 |
| 9  | 6 | 0 | -7.477794  | 2.766889  | -0.207016 |
| 10 | 6 | 0 | -9.759844  | 1.200489  | -0.655989 |
| 11 | 6 | 0 | -8.722698  | 3.370000  | -0.276501 |
| 12 | 6 | 0 | -9.869613  | 2.589337  | -0.499444 |
| 13 | 1 | 0 | -10.643262 | 0.607785  | -0.854647 |
| 14 | 1 | 0 | -8.815275  | 4.441461  | -0.155430 |
| 15 | 1 | 0 | -10.842103 | 3.062967  | -0.552848 |
| 16 | 6 | 0 | -6.830480  | -1.342515 | 0.957994  |
| 17 | 8 | 0 | -7.187373  | -0.984748 | 2.061092  |
| 18 | 8 | 0 | -7.211378  | -2.437292 | 0.312956  |
| 19 | 6 | 0 | -8.149322  | -3.349216 | 1.014860  |
| 20 | 6 | 0 | -9.584928  | -2.923227 | 0.799994  |
| 21 | 1 | 0 | -7.877900  | -3.358028 | 2.071558  |
| 22 | 1 | 0 | -9.787604  | -1.954060 | 1.260872  |
| 23 | 1 | 0 | -9.829703  | -2.882911 | -0.263998 |
| 24 | 1 | 0 | -10.249257 | -3.656683 | 1.265181  |
| 25 | 6 | 0 | -1.389128  | 1.352334  | -1.265573 |
| 26 | 6 | 0 | -0.530383  | 2.154310  | -0.261276 |
| 27 | 1 | 0 | -1.307839  | 0.281522  | -1.077394 |
| 28 | 1 | 0 | -1.051949  | 1.555943  | -2.287654 |
| 29 | 6 | 0 | 0.956203   | 1.813650  | -0.408244 |

|    |   |   |           |           |           |
|----|---|---|-----------|-----------|-----------|
| 30 | 1 | 0 | -0.684604 | 3.227074  | -0.429873 |
| 31 | 1 | 0 | -0.879053 | 1.932758  | 0.753671  |
| 32 | 1 | 0 | 1.125428  | 0.746666  | -0.221225 |
| 33 | 1 | 0 | 1.285049  | 2.014448  | -1.434845 |
| 34 | 7 | 0 | -2.787571 | 1.714526  | -1.169815 |
| 35 | 1 | 0 | -3.087935 | 2.622675  | -1.506531 |
| 36 | 6 | 0 | 1.816971  | 2.644572  | 0.567891  |
| 37 | 1 | 0 | 1.531212  | 2.454252  | 1.604246  |
| 38 | 1 | 0 | 1.662962  | 3.711356  | 0.384529  |
| 39 | 7 | 0 | 3.243856  | 2.389178  | 0.404246  |
| 40 | 1 | 0 | 3.705661  | 2.950452  | -0.298590 |
| 41 | 6 | 0 | 3.989925  | 1.473925  | 1.039893  |
| 42 | 6 | 0 | 5.411347  | 1.351069  | 0.785954  |
| 43 | 6 | 0 | 3.424666  | 0.598449  | 2.009612  |
| 44 | 6 | 0 | 6.135016  | 2.123212  | -0.133935 |
| 45 | 6 | 0 | 6.125563  | 0.376438  | 1.557149  |
| 46 | 6 | 0 | 4.241437  | -0.287722 | 2.698678  |
| 47 | 1 | 0 | 2.367470  | 0.622498  | 2.229727  |
| 48 | 6 | 0 | 7.506595  | 1.943591  | -0.314186 |
| 49 | 1 | 0 | 5.658140  | 2.886127  | -0.738993 |
| 50 | 6 | 0 | 7.522212  | 0.203919  | 1.362173  |
| 51 | 1 | 0 | 3.816686  | -0.938698 | 3.452823  |
| 52 | 6 | 0 | 8.202236  | 0.979072  | 0.431888  |
| 53 | 1 | 0 | 8.041606  | 2.551561  | -1.031709 |
| 54 | 1 | 0 | 8.028018  | -0.538556 | 1.965239  |



|    |    |   |           |           |           |
|----|----|---|-----------|-----------|-----------|
| 55 | 7  | 0 | 5.558977  | -0.411516 | 2.495763  |
| 56 | 17 | 0 | 9.894577  | 0.766196  | 0.198625  |
| 57 | 6  | 0 | -4.103786 | -2.384121 | 0.778100  |
| 58 | 1  | 0 | -4.596528 | -3.169852 | 0.198402  |
| 59 | 1  | 0 | -3.026706 | -2.535653 | 0.735584  |
| 60 | 1  | 0 | -4.435081 | -2.489574 | 1.816419  |
| 61 | 1  | 0 | -6.586209 | 3.355805  | -0.037828 |
| 62 | 1  | 0 | -8.439467 | -0.478844 | -0.729786 |
| 63 | 1  | 0 | -7.932380 | -4.316468 | 0.564637  |
| 64 | 80 | 0 | 3.987736  | -1.814063 | -1.076749 |

**Table S3.** (a) Selected data of electronic transitions in **5:Cu<sup>2+</sup>** by TDDFT method at the B3LYP/GEN level.<sup>[a][b]</sup>

| State | $\lambda$ [nm (eV)] | f      | Composition of band and CI coefficients                  |
|-------|---------------------|--------|----------------------------------------------------------|
| 40    | 305.59(4.05)        | 0.2675 | H→L+2, -0.31; H→L+3, 0.55                                |
| 50    | 276.78 (4.48)       | 0.2822 | H-11→L, 0.19; H-10 →L, -0.22; H-3→L, 0.53; H-1→L+3, 0.15 |

[a] Calculations were carried out for the lowest 50 excited states, and only energies above 260 nm with  $f > 0.03$  are shown. [b]  $f$  = oscillator strength; CI = configuration interaction; H = HOMO; L = LUMO

(b) Cartesian coordinates from the optimized structure of **5**:Cu<sup>2+</sup> at MPW1PW91/GEN.

E= -2126.53a.u.

---

| <b>Center</b> | <b>Atomic</b> | <b>Atomic</b> | <b>Coordinates (Angstroms)</b> |           |           |
|---------------|---------------|---------------|--------------------------------|-----------|-----------|
| <b>Number</b> | <b>Number</b> | <b>Type</b>   | <b>X</b>                       | <b>Y</b>  | <b>Z</b>  |
| 1             | 6             | 0             | 4.429817                       | 1.301003  | -0.722259 |
| 2             | 6             | 0             | 5.703188                       | 0.759331  | -0.338205 |
| 3             | 6             | 0             | 5.768761                       | -0.636804 | 0.011752  |
| 4             | 6             | 0             | 3.515636                       | -0.757697 | -0.363024 |
| 5             | 7             | 0             | 3.350068                       | 0.541881  | -0.742389 |
| 6             | 7             | 0             | 4.657242                       | -1.367697 | 0.009539  |
| 7             | 6             | 0             | 7.010091                       | -1.304702 | 0.388784  |
| 8             | 6             | 0             | 8.256426                       | -0.909156 | -0.143292 |
| 9             | 6             | 0             | 6.951876                       | -2.406982 | 1.268116  |
| 10            | 6             | 0             | 9.411652                       | -1.595837 | 0.204672  |
| 11            | 6             | 0             | 8.112729                       | -3.073948 | 1.628334  |
| 12            | 6             | 0             | 9.346055                       | -2.670024 | 1.098947  |
| 13            | 1             | 0             | 10.362591                      | -1.304345 | -0.222161 |
| 14            | 1             | 0             | 8.067895                       | -3.904317 | 2.321094  |
| 15            | 1             | 0             | 10.251420                      | -3.193504 | 1.380316  |
| 16            | 6             | 0             | 6.831372                       | 1.708783  | -0.087056 |
| 17            | 8             | 0             | 7.125118                       | 1.991501  | 1.054741  |
| 18            | 8             | 0             | 7.357210                       | 2.211288  | -1.197156 |
| 19            | 6             | 0             | 8.404003                       | 3.251490  | -1.040826 |

---

|    |   |   |           |           |           |
|----|---|---|-----------|-----------|-----------|
| 20 | 6 | 0 | 9.771761  | 2.625744  | -0.877772 |
| 21 | 1 | 0 | 8.132477  | 3.872277  | -0.185700 |
| 22 | 1 | 0 | 9.843884  | 2.058784  | 0.052889  |
| 23 | 1 | 0 | 10.011793 | 1.976104  | -1.722725 |
| 24 | 1 | 0 | 10.525601 | 3.417083  | -0.843155 |
| 25 | 6 | 0 | 1.080879  | -1.171979 | -0.792418 |
| 26 | 6 | 0 | 0.040028  | -1.584911 | 0.257800  |
| 27 | 1 | 0 | 1.074438  | -0.097048 | -0.973128 |
| 28 | 1 | 0 | 0.872393  | -1.677753 | -1.744039 |
| 29 | 6 | 0 | -1.391058 | -1.347210 | -0.241753 |
| 30 | 1 | 0 | 0.166084  | -2.649833 | 0.495576  |
| 31 | 1 | 0 | 0.221236  | -1.028260 | 1.184380  |
| 32 | 1 | 0 | -1.553717 | -0.281752 | -0.442945 |
| 33 | 1 | 0 | -1.543227 | -1.873640 | -1.192004 |
| 34 | 7 | 0 | 2.427491  | -1.541214 | -0.374500 |
| 35 | 1 | 0 | 2.608875  | -2.503655 | -0.105404 |
| 36 | 6 | 0 | -2.432169 | -1.849322 | 0.770480  |
| 37 | 1 | 0 | -2.365380 | -1.295134 | 1.711072  |
| 38 | 1 | 0 | -2.231095 | -2.896746 | 1.016145  |
| 39 | 7 | 0 | -3.802842 | -1.787905 | 0.271349  |
| 40 | 1 | 0 | -4.131580 | -2.611239 | -0.205521 |
| 41 | 6 | 0 | -4.674234 | -0.771754 | 0.433453  |
| 42 | 6 | 0 | -6.029926 | -0.880486 | -0.059287 |
| 43 | 6 | 0 | -4.322531 | 0.422593  | 1.083696  |
| 44 | 6 | 0 | -6.518908 | -2.015942 | -0.747852 |

|    |    |   |            |           |           |
|----|----|---|------------|-----------|-----------|
| 45 | 6  | 0 | -6.927101  | 0.202920  | 0.162821  |
| 46 | 6  | 0 | -5.262187  | 1.423746  | 1.260666  |
| 47 | 1  | 0 | -3.324123  | 0.584605  | 1.459864  |
| 48 | 6  | 0 | -7.817667  | -2.089505 | -1.198778 |
| 49 | 1  | 0 | -5.878289  | -2.867087 | -0.942285 |
| 50 | 6  | 0 | -8.253335  | 0.115397  | -0.303941 |
| 51 | 1  | 0 | -4.975860  | 2.332378  | 1.774860  |
| 52 | 6  | 0 | -8.692293  | -1.008016 | -0.971889 |
| 53 | 1  | 0 | -8.174155  | -2.965404 | -1.722944 |
| 54 | 1  | 0 | -8.936654  | 0.942152  | -0.137042 |
| 55 | 7  | 0 | -6.529825  | 1.346831  | 0.831395  |
| 56 | 17 | 0 | -10.324138 | -1.099534 | -1.538577 |
| 57 | 6  | 0 | 4.278624   | 2.737964  | -1.096190 |
| 58 | 1  | 0 | 4.894915   | 2.980448  | -1.966380 |
| 59 | 1  | 0 | 3.236101   | 2.950173  | -1.326133 |
| 60 | 1  | 0 | 4.600187   | 3.391936  | -0.278676 |
| 61 | 1  | 0 | 5.994139   | -2.709748 | 1.670402  |
| 62 | 1  | 0 | 8.315683   | -0.106822 | -0.868037 |
| 63 | 1  | 0 | 8.318226   | 3.825303  | -1.962132 |
| 64 | 29 | 0 | -7.758483  | 2.741840  | 1.158321  |

---

**Complete Reference for Gaussian (Reference 13 in manuscript)**

Gaussian 09, Revision B.01, M. J. Frisch, G. W. Trucks, H. B. Schlegel, G. E. Scuseria, M. A. Robb, J. R. Cheeseman, G. Scalmani, V. Barone, B. Mennucci, G. A. Petersson, H. Nakatsuji, M. Caricato, X. Li, H. P. Hratchian, A. F. Izmaylov, J. Bloino, G. Zheng, J. L. Sonnenberg, M. Hada, M. Ehara, K. Toyota, R. Fukuda, J. Hasegawa, M. Ishida, T. Nakajima, Y. Honda, O. Kitao, H.

Nakai, T. Vreven, J. A. Montgomery Jr., J. E. Peralta, F. Ogliaro, M. Bearpark, J. J. Heyd, E. Brothers, K. N. Kudin, V. N. Staroverov, T. Keith, R. Kobayashi, J. Normand, K. Raghavachari, A. Rendell, J. C. Burant, S. S. Iyengar, J. Tomasi, M. Cossi, N. Rega, J. M. Millam, M. Klene, J. E. Knox, J. B. Cross, V. Bakken, C. Adamo, J. Jaramillo, R. Gomperts, R. E. Stratmann, O. Yazyev, A. J. Austin, R. Cammi, C. Pomelli, J. W. Ochterski, R. L. Martin, K. Morokuma, V. G. Zakrzewski, G. A. Voth, P. Salvador, J. J. Dannenberg, S. Dapprich, A. D. Daniels, O. Farkas, J. B. Foresman, J. V. Ortiz, J. Cioslowski and D. J. Fox, Gaussian, Inc., Wallingford CT, 2010.
